# Supplementary material
Source: PubMed Central journal article supplement (PMC5699940)
Supplement: NIHMS899667-supplement-2.pdf [file NIHMS899667-supplement-2.pdf]

**Supplemental Table 1. The average dosimetric values from 10 patients with simulated spacing**

| Prox-duod*           | Original plan    | Sep - 2 mm      | p value (O-2) | Sep - 3 mm      | p value (O-3) | Sep - 5 mm      | p-value (O-5) | Sep - 8 mm      | p-value (O-8) | Sep - 15 mm     | p-value (O-15) |
|----------------------|------------------|-----------------|---------------|-----------------|---------------|-----------------|---------------|-----------------|---------------|-----------------|----------------|
| V <sub>15</sub> (cc) | 11.237<br>±2.812 | 9.408<br>±2.150 | <0.01         | 8.424<br>±1.874 | <0.01         | 6.464<br>±1.814 | <0.01         | 4.978<br>±1.931 | <0.01         | 2.996<br>±1.624 | <0.01          |
| V <sub>20</sub> (cc) | 3.349<br>±1.290  | 2.104<br>±0.867 | <0.01         | 1.593<br>±0.775 | <0.01         | 0.751<br>±0.467 | <0.01         | 0.299<br>±0.242 | <0.01         | 0.074<br>±0.113 | <0.01          |
| V <sub>33</sub> (cc) | 0.039<br>±0.043  | 0.003<br>±0.009 | 0.03          | 0.000<br>±0.000 | 0.02          | 0.000<br>±0.000 | 0.02          | 0.000<br>±0.000 | 0.02          | 0.000<br>±0.000 | 0.02           |

\*Prox-duod (proximal duodenum) is defined as the overlap between duodenum and the expanded PTV with 20 cm expansion in the axial direction and 1 cm expansion in the superior-inferior direction. The O-2, O-3, O-5, O-8 and O-15 represent the p-value between the original plan and the corresponding plan with the simulated spacing distance 2 mm, 3 mm, 5 mm, 8 mm and 15 mm respectively. The results are averaged over all 10 patients.

**Supplemental Table 2. The proximal duodenum volume receiving 15 Gy (V15) in each original plan and model plans with simulated spacing**

| V <sub>15</sub> (cc) | Original plan | Sep – 2 mm | Sep – 3 mm | Sep – 5 mm | Sep – 8 mm | Sep – 15 mm |
|----------------------|---------------|------------|------------|------------|------------|-------------|
| Patient 1            | 9.86          | 8.89       | 8.02       | 6.13       | 4.53       | 3.14        |
| Patient 2            | 6.63          | 6.1        | 5.83       | 4.02       | 3.14       | 2.19        |
| Patient 3            | 13.85         | 8.16       | 7.35       | 4.46       | 2.74       | 2.47        |
| Patient 4            | 9.97          | 8.06       | 6.7        | 5.1        | 3.68       | 1.37        |
| Patient 5            | 11.89         | 10.54      | 8.98       | 5.75       | 3.57       | 1.6         |
| Patient 6            | 16.07         | 13.03      | 12.05      | 9.72       | 8.68       | 5.11        |
| Patient 7            | 7.86          | 7.2        | 6.75       | 5.86       | 4.43       | 1.27        |
| Patient 8            | 12.26         | 11.07      | 9.8        | 8.15       | 7.38       | 6.12        |
| Patient 9            | 13.05         | 11.64      | 9.93       | 8          | 5.56       | 2.73        |
| Patient 10           | 10.93         | 9.39       | 8.83       | 7.45       | 6.07       | 3.96        |

**Supplemental Table 3. The proximal duodenum volume receiving 20 Gy (V20) in each original plan and model plans with simulated spacing**

| V <sub>20</sub> (cc) | Original plan | Sep – 2 mm | Sep – 3 mm | Sep – 5 mm | Sep – 8 mm | Sep – 15 mm |
|----------------------|---------------|------------|------------|------------|------------|-------------|
| Patient 1            | 4.23          | 3.02       | 2.46       | 1.27       | 0.51       | 0.34        |
| Patient 2            | 2.6           | 2.2        | 2          | 1.02       | 0.72       | 0.16        |
| Patient 3            | 6.13          | 2.67       | 1.96       | 0.55       | 0.06       | 0.16        |
| Patient 4            | 2.71          | 1.69       | 0.99       | 0.42       | 0.12       | 0           |
| Patient 5            | 3.26          | 2.42       | 1.36       | 0.37       | 0.19       | 0           |
| Patient 6            | 3.32          | 0.7        | 0.56       | 0.27       | 0.03       | 0           |
| Patient 7            | 3.31          | 2.61       | 2.24       | 1.3        | 0.4        | 0           |
| Patient 8            | 1.36          | 0.74       | 0.45       | 0.11       | 0.05       | 0           |
| Patient 9            | 2.41          | 1.81       | 1.29       | 0.84       | 0.38       | 0.03        |
| Patient 10           | 4.16          | 3.18       | 2.62       | 1.36       | 0.53       | 0.05        |

**Supplemental Table 4. The proximal duodenum volume receiving 33 Gy (V33) in each original plan and model plans with simulated spacing**

| <b>V<sub>33</sub> (cc)</b> | <b>Previous plan</b> | <b>Sep – 2 mm</b> | <b>Sep – 3 mm</b> | <b>Sep – 5 mm</b> | <b>Sep – 8 mm</b> | <b>Sep – 15 mm</b> |
|----------------------------|----------------------|-------------------|-------------------|-------------------|-------------------|--------------------|
| Patient 1                  | 0.01                 | 0                 | 0                 | 0                 | 0                 | 0                  |
| Patient 2                  | 0.04                 | 0.03              | 0                 | 0                 | 0                 | 0                  |
| Patient 3                  | 0.09                 | 0                 | 0                 | 0                 | 0                 | 0                  |
| Patient 4                  | 0.04                 | 0                 | 0                 | 0                 | 0                 | 0                  |
| Patient 5                  | 0.0                  | 0                 | 0                 | 0                 | 0                 | 0                  |
| Patient 6                  | 0.01                 | 0                 | 0                 | 0                 | 0                 | 0                  |
| Patient 7                  | 0.1                  | 0                 | 0                 | 0                 | 0                 | 0                  |
| Patient 8                  | 0.1                  | 0                 | 0                 | 0                 | 0                 | 0                  |
| Patient 9                  | 0.0                  | 0                 | 0                 | 0                 | 0                 | 0                  |
| Patient 10                 | 0.0                  | 0                 | 0                 | 0                 | 0                 | 0                  |
