# Supplementary material
Source: PubMed Central journal article supplement (PMC5699940)

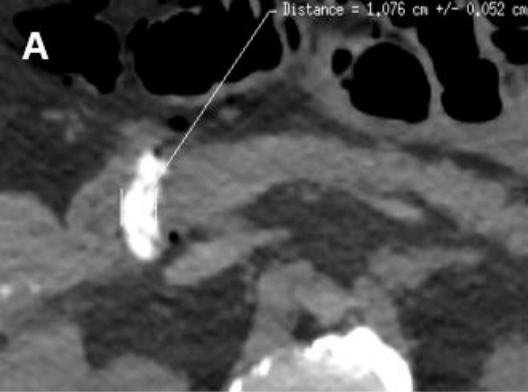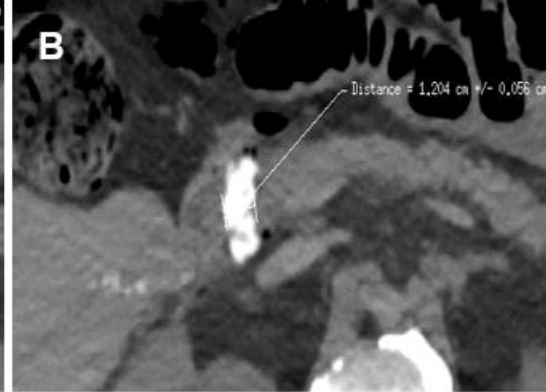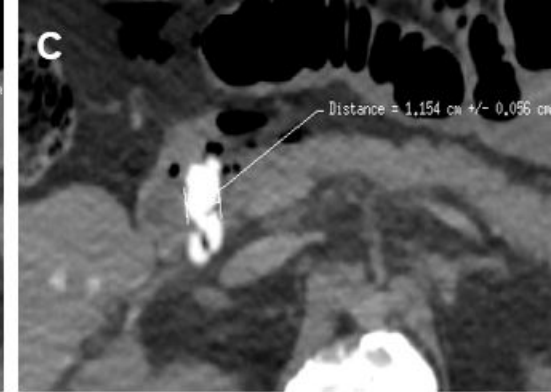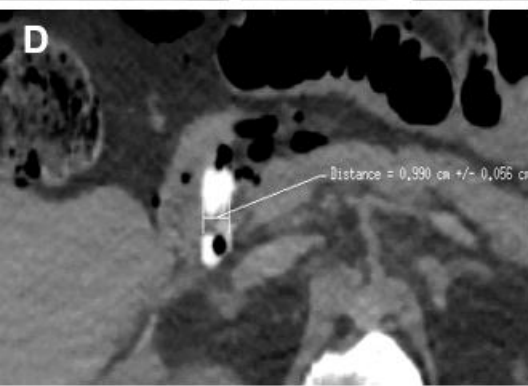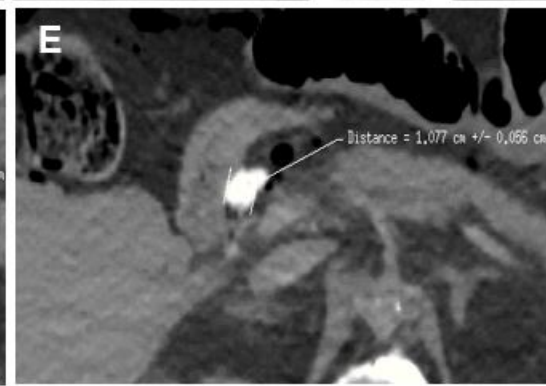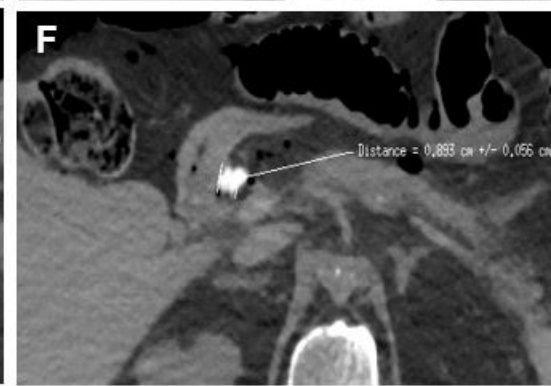

Supplement: NIHMS899667-supplement-1.pdf [file NIHMS899667-supplement-1.pdf]
